# Supplementary material for: Adherence, duration and healthcare costs in a real-world population of patients with acromegaly
Source: Atypon-hosted journal article supplement (doi:10.57264/cer-2025-0080), 2025-07-08
Supplement: supplementary materials.docx [file supplementary%20materials.docx]

**Appendix**

**Table A. List of CPT and ICD codes for hypophysectomy and stereotactic radiosurgery**

| Hypophysectomy | CPT | 61546 | Craniotomy for hypophysectomy or excision of pituitary tumor, intracranial approach |
| --- | --- | --- | --- |
| 61548 | Hypophysectomy or excision of pituitary tumor, transnasal or transseptal approach, nonstereotactic |
| 62165 | Neuroendoscopy, intracranial; with excision of pituitary tumor, transnasal or trans-sphenoidal approach |
| ICD-9-CM Procedure | 07.61 | Partial excision of pituitary gland, transfrontal approach |
| 07.62 | Partial excision of pituitary gland, transsphenoidal approach |
| 07.63 | Partial excision of pituitary gland, unspecified approach |
| 07.64 | Total excision of pituitary gland, transfrontal approach |
| 07.65 | Total excision of pituitary gland, transsphenoidal approach |
| 07.68 | Total excision of pituitary gland, other specified approach |
| 07.69 | Total excision of pituitary gland, unspecified approach |
| ICD-10-CM Procedure | 0G500ZZ | Destruction of Pituitary Gland, Open Approach |
| 0G503ZZ | Destruction of Pituitary Gland, Percutaneous Approach |
| 0G504ZZ | Destruction of Pituitary Gland, Percutaneous Endoscopic Approach |
| 0G800ZZ | Division of Pituitary Gland, Open Approach |
| 0G803ZZ | Division of Pituitary Gland, Percutaneous Approach |
| 0G804ZZ | Division of Pituitary Gland, Percutaneous Endoscopic Approach |
| 0GB00ZZ | Excision of Pituitary Gland, Open Approach |
| 0GB03ZZ | Excision of Pituitary Gland, Percutaneous Approach |
| 0GB04ZZ | Excision of Pituitary Gland, Percutaneous Endoscopic Approach |
| 0GT00ZZ | Resection of Pituitary Gland, Open Approach |
| 0GT04ZZ | Resection of Pituitary Gland, Percutaneous Endoscopic Approach |
| Stereotactic radiosurgery | CPT | 61796 | Stereotactic radiosurgery (particle beam, gamma ray, or linear accelerator); 1 simple cranial lesion |
| 61797 | Stereotactic radiosurgery (particle beam, gamma ray, or linear accelerator); each additional cranial lesion, simple (List separately in addition to code for primary procedure) |
| 61798 | Stereotactic radiosurgery (particle beam, gamma ray, or linear accelerator); 1 complex cranial lesion |
| 61799 | Stereotactic radiosurgery (particle beam, gamma ray, or linear accelerator); each additional cranial lesion, complex (List separately in addition to code for primary procedure) |
| 77371 | Radiation treatment delivery, stereotactic radiosurgery (SRS), complete course of treatment of cranial lesion(s) consisting of 1 session; multi-source Cobalt 60 based |
| 77372 | Radiation treatment delivery, stereotactic radiosurgery (SRS), complete course of treatment of cranial lesion(s) consisting of 1 session; linear accelerator based |
| ICD-9-CM Procedure | 92.30 | Stereotactic radiosurgery, not otherwise specified |
| 92.31 | Single source photon radiosurgery |
| 92.32 | Multi-source photon radiosurgery |
| 92.33 | Particulate radiosurgery |
| 92.39 | Stereotactic radiosurgery, not elsewhere classified |
| ICD-10-CM Procedure | D020DZZ | Stereotactic Other Photon Radiosurgery of Brain |
| D020HZZ | Stereotactic Particulate Radiosurgery of Brain |
| D020JZZ | Stereotactic Gamma Beam Radiosurgery of Brain |
| D021DZZ | Stereotactic Other Photon Radiosurgery of Brain Stem |
| D021HZZ | Stereotactic Particulate Radiosurgery of Brain Stem |
| D021JZZ | Stereotactic Gamma Beam Radiosurgery of Brain Stem |
| ICD-9-CM/ICD-10-CM: International Classification of Diseases, 9th Revision/10th Revision, Clinical Modification; CPT: Current Procedural Terminology . | | | |

**Table B. List of ICD-9 codes and ICD-10 codes for comorbidities of interest**

| **Category** | **Sub-category** | **ICD-9-CM** | **ICD-10-CM** |
| --- | --- | --- | --- |
| Cardiovascular | Cardiac dysrhythmia/arrhythmia | 427.xx | I47.1, I46.2, I46.8, I46.9, I49.2, I47.0, I47.2, I47.9, I48.0, I48.1, I48.2, I48.91, I48.3, I48.4, I48.92, I49.01, I49.02 , I49.40, I49.1, I49.3, I49.49, I49.5, R00.1, I49.8, I49.9 |
| Cardiac hypertrophy | 429.3 | I51.7 |
| Cardiomyopathy | 425.x | I42.x, I43, I42.9, I42.1, I42.2 |
| Congestive heart failure | 428.xx, 398.91, 402.01, 402.11, 402.91, 404.01, 404.11, 404.91, 404.04, 404.13, 404.93 | I50.xxx, , I09.81, I11.0, I13.0, I13.2 |
| Hypertension | 362.11, 401.x, 402.01, 402.11, 402.91, 402.00, 402.10, 402.90, 403.xx, 404.xx, 437.2 | H35.031, H35.032, H35.033, H35.039, I10, I11.0, I11.9, I12.0, I12.9, I13.0, I13.10, I13.11, I13.2, I67.4, I16.0, I16.1, I16.9 |
| Valvular heart disease | 395.x, 424.1, 746.3, 746.4, 746.5, 394.x, 429.5, 429.6, 424.0, 746.6, 394.9, 397.0, 397.9, 396.8, 396.9, 424.3, 746.01, 746.02, 424.2, 746.1, 746.2, 424.9x | I06.0, I06.1, I06.2, I06.8, I06.9, I35.0, I35.1, I35.2, I35.8, I35.9, Q23.0, Q23.1, Q25.2, I05.0, I05.1, I05.2, I05.8, I05.9, I23.4, I23.5, I34.0, I34.1, I34.2, I34.8x, I34.9, Q23.2, Q23.3, I08.2, I08.0, Q23.4, I08.3, I08.8, I08.9, I08.1, I37.0, I37.1, I37.2, I37.8, I37.9, Q22.0, Q22.1, I07.0, I07.1, I07.2, I07.8, I07.9, I36.0, I36.1, I36.2, I36.8, I36.9, Q22.5, Q22.8, I38, A18.84, I39, M32.11 |
| COPD |  | 491.0, 491.1, 491.8, 491.9, 492.8, 492.0, 491.22, 493.21, 491.20, 493.20, 496, 494.1, 494.0 | J410, J411, J418, J42, J430, J431, J432, J438, J439, J440, J441, J449, J470, J471, J479 |
| Deficiency anemias |  | 281.x, 280.9, 280.0, 280.1, 280.8 | D50.9, D51.x, D52.x, D53.x, D50.0, D50.8, D50.1 |
| Depression |  | 296.2x, 296.3x, 300.4, 311 | F32.xx, F33.xx, F34.1x, F06.32 |
| Endocrine/metabolic | Diabetes (including impaired glucose intolerance) | 249.xx , 250.xx , 357.2, 362.0x , 366.41, 648.0x , 648.8x , 790.2x , 996.57, V45.85, V53.91, V58.67 | E08.9, E09.9, E13.9, E08.10, E09.10, E13.10, E08.00, E08.01, E09.00, E09.01, E13.00, E13.01, E08.11, E08.641, E09.11, E09.641, E13.11, E13.641, E08.21, E08.22, E08.29, E09.21, E09.22, E09.29, E13.21, E13.22, E13.29, E08.3491, E08.3492, E08.3493, E08.3499, E08.3511, E08.3512, E08.3513, E08.3519, E08.3521, E08.3522, E08.3523, E08.3529, E08.3531, E08.3532, E08.3533, E08.37X1, E08.37X2, E08.37X3, E08.37X9, E09.3551, E09.3552, E09.3553, E09.3559, E09.3591, E09.3592, E09.3593, E09.3599, E09.36, E09.37X1, E09.37X2, E09.37X3, E09.37X9, E09.39, E13.311, E13.319, E13.3211, E13.3212, E13.3213, E13.3219, E13.3291, E13.3292, E13.3293, E13.3299, E13.3311, E13.3312, E13.3313, E13.3319, E13.3391, E13.3392, E13.3393, E13.3399, E13.3411, E13.3412, E13.3413, E13.3419, E13.3491, E13.3492, E13.3493, E13.3499, E13.3511, E13.3512, E13.3513, E13.3519, E13.3521, E13.3522, E13.3523, E13.3529, E13.3531, E13.3532, E13.3533, E13.3539, E13.3541, E13.3542, E13.3543, E13.3549, E13.3551, E13.3552, E13.3553, E13.3559, E13.36, E13.37X1, E13.37X2, E13.37X3, E13.37X9, E13.39, E08.311, E08.319, E08.3211, E08.3212, E08.3213, E08.3219, E08.3291, E08.3292, E08.3293, E08.3299, E08.3311, E08.3312, E08.3313, E08.3319, E08.3391, E08.3392, E08.3393, E08.3399, E08.3411, E08.3412, E08.3413, E08.3419, E08.3539, E08.3541, E08.3542, E08.3543, E08.3549, E08.3551, E08.3552, E08.3553, E08.3559, E08.3591, E08.3592, E08.3593, E08.3599, E08.36, E08.39, E08.65, E09.311, E09.319, E09.3291, E09.3292, E09.3293, E09.3299, E09.3391, E09.3392, E09.3393, E09.3399, E09.3491, E09.3492, E09.3493, E09.3499, E09.3511, E09.3512, E09.3513, E09.3519, E09.3521, E09.3522, E09.3523, E09.3529, E09.3531, E09.3532, E09.3533, E09.3539, E09.3541, E09.3542, E09.3543, E09.3549, E09.65, E13.3591, E13.3592, E13.3593, E13.3599, E13.65, E08.69, E09.69, E10.40, E10.42, E11.40, E11.42, E10.36, E11.36, E09.3211, E09.3212, E09.3213, E09.3219, E09.3311, E09.3312, E09.3313, E09.3319, E09.3411, E09.3412, E09.3413, E09.3419, E10.311, E10.3211, E10.3212, E10.3213, E10.3219, E10.3311, E10.3312, E10.3313, E10.3319, E10.3411, E10.3412, E10.3413, E10.3419, E10.3511, E10.3512, E10.3513, E10.3519, E11.311, E11.3211, E11.3212, E11.3213, E11.3219, E11.3311, E11.3312, E11.3313, E11.3319, E11.3411, E11.3412, E11.3413, E11.3419, E10.319, E11.319, E10.3521, E10.3522, E10.3523, E10.3529, E10.3531, E10.3532, E10.3533, E10.3539, E10.3541, E10.3542, E10.3543, E10.3549, E10.3551, E10.3552, E10.3553, E10.3559, E10.3591, E10.3592, E10.3593, E10.3599, E11.3511, E11.3512, E11.3513, E11.3519, E11.3521, E11.3522, E11.3523, E11.3529, E11.3531, E11.3532, E11.3533, E11.3539, E11.3541, E11.3542, E11.3543, E11.3549, E11.3551, E11.3552, E11.3553, E11.3559, E11.3591, E11.3592, E11.3593, E11.3599, E11.3291, E11.3292, E11.3293, E11.3299, E10.3291, E10.3292, E10.3293, E10.3299, E10.3391, E10.3392, E10.3393, E10.3399, E11.3391, E11.3392, E11.3393, E11.3399, E10.3491, E10.3492, E10.3493, E10.3499, E11.3491, E11.3492, E11.3493, E11.3499, Z46.81, Z96.41, T85.614A, T85.624A, T85.633A, T85.694A, R73.01, R73.02, R73.03, R73.09, R73.9, O24.019, O24.119, O24.319, O24.819, O24.919, O24.011, O24.012, O24.013, O24.02, O24.111, O24.112, O24.113, O24.12, O24.311, O24.312, O24.313, O24.32, O24.811, O24.812, O24.813, O24.82, O24.911, O24.912, O24.913, O24.92, O24.93, O24.03, O24.13, O24.33, O24.83, O99.810, O24.410, O24.414, O24.419, O24.420, O24.424, O24.425, O24.429, O99.814, O24.430, O24.434, O24.435, O24.439, O99.815, E08.40, E08.41, E08.42, E08.43, E08.44, E08.49, E09.40, E09.41, E09.42, E09.43, E09.44, E09.49, E13.40, E13.41, E13.42, E13.43, E13.44, E13.49, E08.51, E08.52, E08.59, E09.51, E09.52, E09.59, E13.51, E13.52, E13.59, E08.620, E08.621, E08.622, E08.628, E08.630, E08.638, E08.649, E09.620, E09.621, E09.622, E09.628, E09.630, E09.638, E09.649, E13.620, E13.621, E13.622, E13.628, E13.630, E13.638, E13.649, E13.69, E08.8, E09.8, E13.8, Z79.4 |
| Galactorrhea | 676.6x, 611.6 | O92.6, N64.3 |
| Hypothyroidism | 244.0, 244.1, 243, 244.8, 244.9 | E03.1, E03.8, E03.9, E89.0 |
| Impaired libido/impotence | 799.81, 607.84 | R68.82, N40.0, N40.1, N52.01, N52.02, N52.03, N52.1, N52.2, N52.3x, N52.8, N52.9 |
| Menstrual abnormalities | 626.0, 626.1, 626.2, 626.4, 626.5, 626.8, 626.9, 625.3, 627.0, 627.1, N92.4, N95.0 | N91.0, N91.1, N91.2, N91.3, N91.4, N91.5, N92.0, N92.5, N92.6, N92.3, N89.7, N93.1, N93.8, N93.9, N94.4, N94.5, N94.6 |
| Obesity | 278.0x, V85.3x, V85.4x | E66.xx, Z68.3x, Z68.4x |
| Musculoskeletal | Arthropathy/arthralgia/synovitis | 713.x, 716.4x, 716.5x, 716.8x, 716.9x, 727.0x | M02.9, M02.00, M02.011, M02.012, M02.019, M02.021, M02.022, M02.029, M02.031, M02.032, M02.039, M02.041, M02.042, M02.049, M02.051, M02.052, M02.059, M02.061, M02.062, M02.069, M02.071, M02.072, M02.079, M02.08, M02.09, M07.60, M07.611, M07.612, M07.619, M07.621, M07.622, M07.629, M07.631, M07.632, M07.639, M07.641, M07.642, M07.649, M07.651, M07.652, M07.659, M07.661, M07.662, M07.669, M07.671, M07.672, M07.679, M07.68, M07.69, M36.2, M36.3, A52.16, E08.610, E09.610, E10.610, E11.610, E13.610, M14.60, M14.611, M14.612, M14.619, M14.621, M14.622, M14.629, M14.631, M14.632, M14.639, M14.641, M14.642, M14.649, M14.651, M14.652, M14.659, M14.661, M14.662, M14.669, M14.671, M14.672, M14.679, M14.68, M14.69, M02.20, M02.211, M02.212, M02.219, M02.221, M02.222, M02.229, M02.231, M02.232, M02.239, M02.241, M02.242, M02.249, M02.251, M02.252, M02.259, M02.261, M02.262, M02.269, M02.271, M02.272, M02.279, M02.28, M02.29, M36.4, M14.80, M14.811, M14.812, M14.819, M14.821, M14.822, M14.829, M14.831, M14.832, M14.839, M14.841, M14.842, M14.849, M14.851, M14.852, M14.859, M14.861, M14.862, M14.869, M14.871, M14.872, M14.879, M14.88, M14.89, M36.1, M12.87x, M12.89, M12.88, M12.80, M12.81x, M12.82x, M12.83x, M12.84x, M12.85x, M12.86x, E08.618, E09.618, E10.618, E11.618, E13.618, M07.61x, M07.62x, M07.63x, M07.64x, M07.65x, M07.66x, M07.67x, M07.89, M12.9, M08.1, M45.0, M45.1, M45.2, M45.3, M45.4, M45.5, M45.6, M45.7, M45.8, M45.9, M48.8X1, M48.8X2, M48.8X3, M48.8X4, M48.8X5, M48.8X6, M48.8X7, M48.8X8, M48.8X9, M65.9, M65.80, D48.1, M65.30, M65.311, M65.312, M65.319, M65.321, M65.322, M65.329, M65.331, M65.332, M65.339, M65.341, M65.342, M65.349, M65.351, M65.352, M65.359, M65.4, M65.831, M65.832, M65.839, M65.841, M65.842, M65.849, M65.871, M65.872, M65.879, M65.10, M65.111, M65.112, M65.119, M65.121, M65.122, M65.129, M65.131, M65.132, M65.139, M65.141, M65.142, M65.149, M65.151, M65.152, M65.159, M65.161, M65.162, M65.169, M65.171, M65.172, M65.179, M65.18, M65.19, M65.811, M65.812, M65.819, M65.821, M65.822, M65.829, M65.851, M65.852, M65.859, M65.861, M65.862, M65.869, M65.88, M65.89, M67.30, M67.311, M67.312, M67.319, M67.321, M67.322, M67.329, M67.331, M67.332, M67.339, M67.341, M67.342, M67.349, M67.351, M67.352, M67.359, M67.361, M67.362, M67.369, M67.371, M67.372, M67.379, M67.38, M67.39 |
| Carpal tunnel syndrome | 354.0 | G56.00  G56.01  G56.02  G56.03 |
| Kyphosis and scoliosis | 737.30, 737.43, 737.41 | M41.112, M41.113, M41.114, M41.115, M41.116, M41.117, M41.119, M41.122, M41.123, M41.124, M41.125, M41.126, M41.127, M41.129, M41.20, M41.22, M41.23, M41.24, M41.25, M41.26, M41.27, M40.10, M40.12, M40.13, M40.14, M40.15, M41.40, M41.41, M41.42, M41.43, M41.44, M41.45, M41.46, M41.47, M41.50, M41.52, M41.53, M41.54, M41.55, M41.56, M41.57 |
| Myopathy/myalgia | 395.5, 359.9, 729.1, 359.6, 359.7x, 359.8x | G73.7, G71.9, G72.9, M05.40, M05.411, M05.412, M05.419, M05.421, M05.422, M05.429, M05.431, M05.432, M05.439, M05.441, M05.442, M05.449, M05.451, M05.452, M05.459, M05.461, M05.462, M05.469, M05.471, M05.472, M05.479, M05.49, M33.02, M33.12, M33.22, M33.92, M34.82, M35.03, G72.41, G72.49, G72.81, G71.3, G72.89, G71.8, M60.80, M60.811, M60.812, M60.819, M60.821, M60.822, M60.829, M60.831, M60.832, M60.839, M60.841, M60.842, M60.849, M60.851, M60.852, M60.859, M60.861, M60.862, M60.869, M60.871, M60.872, M60.879, M60.88, M60.89, M60.9, M79.1, M79.7 |
|  | Osteoarthritis | 715.xx | M19.92, M19.93, M19.11x, M19.21x, M19.12x, M19.22x, M19.13x, M19.23x, M16.2, M16.3x, M16.4, M16.5x, M16.6, M16.7, M17.2, M17.3x, M17.4, M17.5 , M19.17x, M19.27x, M15.0, M15.9, M15.1, M15.2, M19.01x, M19.02x, M19.03x, M18.0, M18.1x, M19.04x, M16.0, M16.1x, M19.07x, M19.91, M19.90, M18.9, M16.9, M17.9, M15.4, M15.8, M15.3 |
|  | Vertebral fracture | 733.13, 805.2, 805.4, 805.6, 805.8, 805.01, 806.00, 806.01, 806.02, 806.03, 806.04, 805.11, 806.10, 806.11, 806.12, 806.13, 806.14, V54.17, 905.1, 805.02, 805.12, 805.03, 805.13, 805.3, 805.5, 806.60, 806.61, 806.62, 806.69, 806.8, 805.7, 805.9, 806.70, 806.71, 806.72, 806.79, 806.9 | S12.0xxx, S12.1xxx, S12.2xxx, S22.0xxx, S32.0xxx, S32.1xxx, S32.2xxx |
| Psychotic disorder |  | 293.81, 293.82 | F23.x, F24.x, F06.0, F06.2, F28, F29 |
| Sleep apnea |  | 780.51, 780.53, 780.57, 327.26, 327.27, 327.29, 327.20, 327.21, 327.23 | G47.30, G47.31, G47.33, G47.36, G47.37, G47.39, G47.14 |

| COPD: chronic obstructive pulmonary disorder; ICD-9-CM/ICD-10-CM: International Classification of Diseases, 9th Revision/10th Revision, Clinical Modification. |
| --- |
